# Supplementary material
Source: publisher site journal article supplement (https://www.dovepress.com/article/278687)
Supplement: Supplementary file 1 [file get_supplementary_file.php]

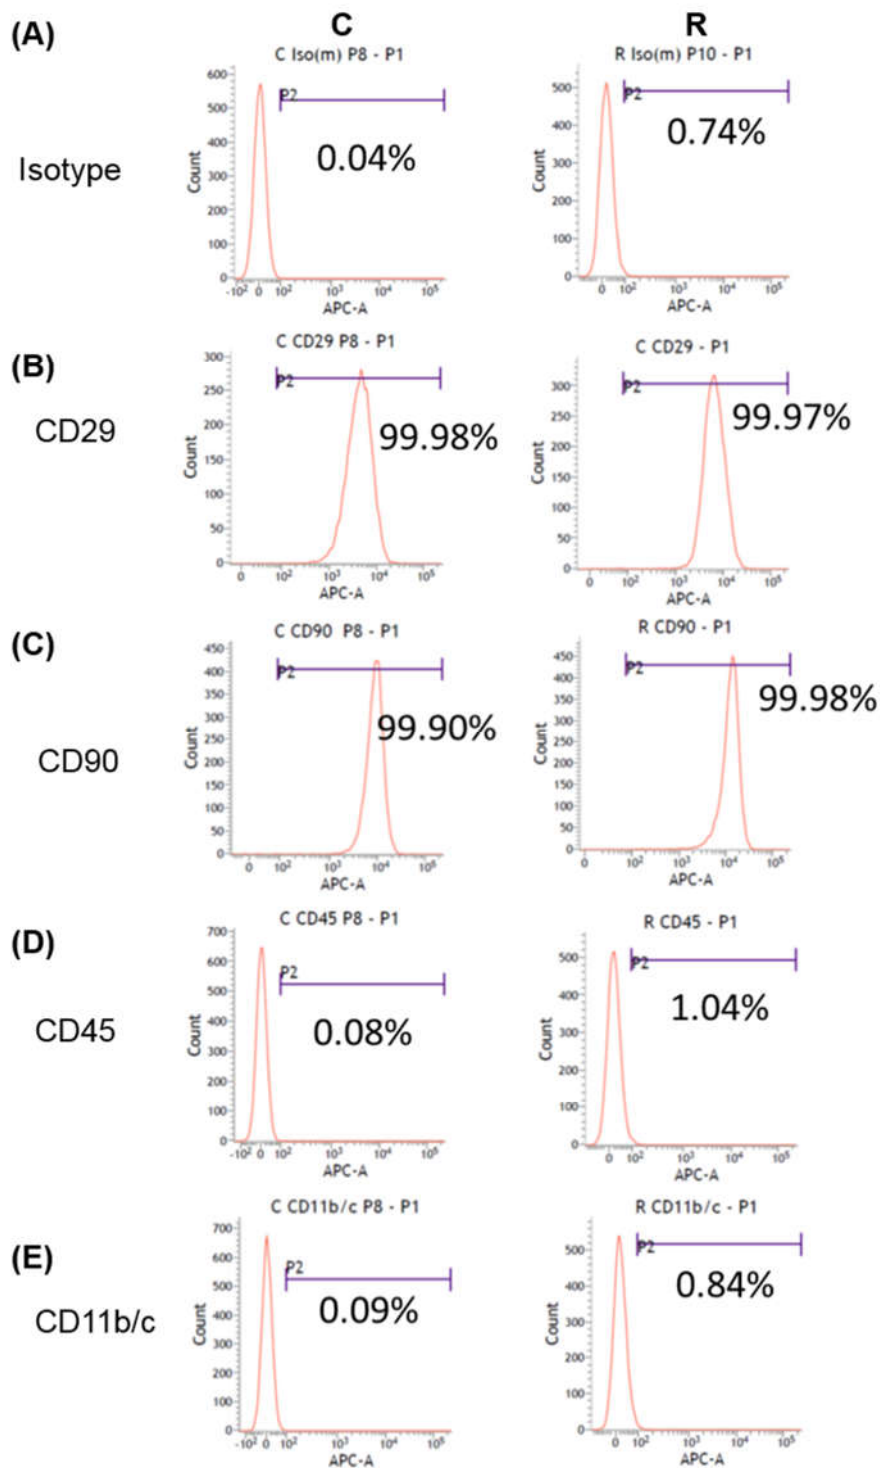

Figure S1

Stemness of RFP+ rMSCs confirmed by flow cytometry. (A) Isotype control. Positive markers: (B) CD29 and (C) CD90. Negative markers: (D) CD45 and (E) CD11b/c. C: mock rMSCs; R: RFP+ rMSCs. Positive ratios were gated by P2.

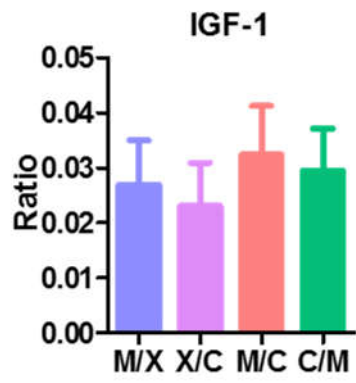

Figure S2

Level of secreted IGF-1. IGF-1 was selected by bioinformatic analysis on day 14 of RFP+ rMSC and CP co-culture.
